# Supplementary material for: Word Entropy-Based Approach to Detect Highly Variable Genetic Markers for Bacterial Genotyping
Source: Front Microbiol. 2021 Feb 3;12:631605. doi: 10.3389/fmicb.2021.631605 (PMC7886790; doi:10.3389/fmicb.2021.631605)
Supplement: Supplementary File 1 — MLST analysis results for E.coli and E. faecium. [file Table_1.XLSX]

## Sheet: MLST_analysis_E.coli
ID	MLST							ST (Warwick*)
	adk	fumC	gyrB	icd	mdh	purA	recA
EC160	6	4	4	16	8	8	14	58
EC161	6	4	4	16	8	8	14	58
EC163	6	4	4	16	8	8	14	58
EC167	6	4	4	16	8	8	14	58
EC155	865	11	57	8	8	8	2	UNW
EC156	53	40	47	13	28	28	29	131
EC157	53	40	47	13	28	28	29	131
EC164	53	40	47	13	28	28	29	131
EC168	53	40	47	13	28	28	29	131
EC170	37	38	19	37	11	11	26	95
EC162	14	14	10	14	7	7	74	404
EC166	14	14	10	14	7	7	74	404
EC158	4	26	2	25	5	5	19	38
EC159	4	26	2	25	5	5	19	38
EC165	109	65	5	1	13	13	14	517
EC169	21	35	27	6	5	5	4	69
EC171	6	65	32	26	8	8	2	297
EC172	6	4	14	16	5	5	14	1049
EC173	6	4	14	16	5	5	14	1049
EC174	43	41	15	18	7	7	6	101
EC177	43	41	15	18	7	7	6	101
*Warwick - for MLST the scheme according Warwick was used

## Sheet: MLST_analysis_E.faecium
ID	MLST							ST
	atpA	ddl	gdh	purK	gyd	pstS	adk
ENFI190	7	1	1	1	5	1	1	18
ENFI116	9	1	1	1	12	1	1	80
ENFI144	9	1	1	1	12	1	1	80
ENFI146	9	1	1	1	12	1	1	80
ENFI148	9	1	1	1	12	1	1	80
ENFI169	9	1	1	1	12	1	1	80
ENFI175	9	1	1	1	12	1	1	80
ENFI176	9	1	1	1	12	1	1	80
ENFI180	9	1	1	1	12	1	1	80
ENFI184	9	1	1	1	12	1	1	80
ENFI191	9	1	1	1	12	1	1	80
ENFI196	9	1	1	1	12	1	1	80
ENFI199	9	1	1	1	12	1	1	80
ENFI204	9	1	1	1	12	1	1	80
ENFI47	9	1	1	1	12	1	1	80
ENFI58	9	1	1	1	12	1	1	80
ENFI61	9	1	1	1	12	1	1	80
ENFI91	9	1	1	1	12	1	1	80
ENFI95	9	1	1	1	12	1	1	80
ENFI57	9	1	1	1	1	1	1	117
ENFI59	9	1	1	1	1	1	1	117
ENFI64	9	1	1	1	1	1	1	117
ENFI99	9	1	1	1	1	1	1	117

## Sheet: MLST_database_data
Escherichia coli		Enterococcus faecium
ID	ST	ID	ST
CP050212.1	2705	CP040236.1	80
CP050219.1	2280	CP036151.1	80
CP050211.1	70	CP027501.1	80
CP050201.1	602	CP035666.1	80
CP050214.1	131	CP035660.1	80
CP050205.1	131	CP035220.1	UNW
