# Supplementary material for: Word Entropy-Based Approach to Detect Highly Variable Genetic Markers for Bacterial Genotyping
Source: Front Microbiol. 2021 Feb 3;12:631605. doi: 10.3389/fmicb.2021.631605 (PMC7886790; doi:10.3389/fmicb.2021.631605)
Supplement: Supplementary File 2 — Potential and final genetic markers for E. coli and E. faecium. [file Table_2.XLSX]

## Sheet: Markers_E.coli
word size [bp]	number of potential markers	number of analyzed combinations of two potential markers	number of analyzed combinations of two potentional markers that classified genomes to 15 clusters	number of combination of two potentional markers that correctly classified genomes to 15 clusters
50	42	861	0	0
100	94	4371	0	0
150	152	11476	0	0
200	199	19701	0	0
250	249	30876	0	0
300	290	41905	13	5
350	157	12246	7	2
400	175	15225	9	3

## Sheet: Markers_E.faecium
word size [bp]	number of potential markers	number of analyzed combinations of two potential markers	number of analyzed combinations of two potentional markers that classified genomes to 9 clusters	number of combination of two potentional markers that correctly classified genomes to 9 clusters
50	5	10	0	0
100	9	36	2	1
150	12	66	3	1
200	14	91	3	1
250	15	105	3	1
300	15	105	3	0
350	17	136	4	1
400	17	136	4	1

## Sheet: Var_fragments_E.coli
word length 50 bp					word length 100 bp					word length 150 bp					word length 200 bp					word length 250 bp					word length 300 bp					word length 350 bp					word length 400 bp
number	start	stop	length [bp]	clusters	number	start	stop	length [bp]	clusters	number	start	stop	length [bp]	clusters	number	start	stop	length [bp]	clusters	number	start	stop	length [bp]	clusters	number	start	stop	length [bp]	clusters	number	start	stop	length [bp]	clusters	number	start	stop	length [bp]	clusters
1	176791	176841	51	10	1	176741	176891	151	10	1	176691	176941	251	10	1	176600	176991	392	10	1	176550	177041	492	10	1	4153	4494	342	10	1	121385	121754	370	11	1	121335	121804	470	11
2	2624563	2624619	57	9	2	615044	615185	142	10	2	435148	435446	299	11	2	361114	361346	233	10	2	361064	361396	333	10	2	5680	5990	311	10	2	434948	435702	755	13	2	434898	435752	855	13
3	2651002	2651054	53	11	3	1500812	1500956	145	10	3	614994	615235	242	10	3	435098	435496	399	11	3	435048	435546	499	11	3	176500	177091	592	10	3	448293	448751	459	12	3	448225	448801	577	12
4	2653329	2653400	72	10	4	2156428	2156545	118	10	4	626420	626579	160	10	4	456318	456533	216	10	4	448227	448489	263	10	4	360941	361524	584	10	4	457062	457469	408	11	4	457012	457519	508	11
5	2657534	2657594	61	9	5	2507261	2507392	132	10	5	804121	804306	186	10	5	457097	457319	223	10	5	456265	456583	319	10	5	434998	435683	686	13	5	626220	626821	602	11	5	536274	536680	407	11
6	2658429	2658582	154	12	6	2589551	2589654	104	10	6	1500759	1501006	248	10	6	614944	615285	342	10	6	457047	457369	323	10	6	448177	448723	547	12	6	681515	681961	447	11	6	626170	626871	702	11
7	2660231	2660290	60	10	7	2590749	2590881	133	10	7	1754319	1754507	189	11	7	626370	626629	260	10	7	614894	615335	442	10	7	456170	456633	464	10	7	799827	800325	499	12	7	637805	638227	423	11
8	2758736	2758795	60	9	8	2591362	2591461	100	11	8	1897079	1897234	156	10	8	733381	733622	242	10	8	626320	626679	360	10	8	456997	457423	427	11	8	803921	804506	586	11	8	681465	682011	547	11
9	2762697	2762753	57	10	9	2621528	2621651	124	10	9	1980820	1981054	235	10	9	764894	765112	219	10	9	663782	664075	294	10	9	614844	615385	542	10	9	987455	987910	456	11	9	799777	800375	599	12
10	2763153	2763212	60	10	10	2624513	2624681	169	11	10	2139030	2139224	195	0	10	800076	800275	200	10	10	681598	681861	264	10	10	626270	626729	460	11	10	1048464	1048977	514	11	10	803871	804556	686	11
11	2763476	2763541	66	11	11	2630542	2630653	112	10	11	2156378	2156595	218	10	11	804071	804356	286	11	11	733331	733672	342	10	11	663732	664125	394	10	11	1077623	1078011	389	11	11	987405	988154	750	11
12	2763620	2763703	84	11	12	2641725	2641857	133	10	12	2507211	2507442	232	10	12	1048614	1048860	247	11	12	764844	765162	319	10	12	681532	681911	380	11	12	1539597	1539988	392	11	12	1048414	1049060	647	11
13	2764156	2764211	56	10	13	2646221	2646390	170	12	13	2513507	2513726	220	10	13	1077845	1078066	222	10	13	799927	800325	399	11	13	733281	733722	442	10	13	1754119	1754767	649	11	13	1077573	1078061	489	11
14	2765059	2765118	60	10	14	2646441	2646582	142	11	14	2580658	2580827	170	10	14	1500709	1501056	348	10	14	804021	804406	386	11	14	764794	765212	419	10	14	2008398	2008755	358	11	14	1309123	1309540	418	11
15	2765377	2765448	72	11	15	2646788	2646923	136	11	15	2589262	2589704	443	12	15	1679983	1680182	200	10	15	987555	987810	256	11	15	799877	800375	499	12	15	2136685	2137106	422	11	15	1484012	1484430	419	11
16	2765766	2765819	54	10	16	2647331	2647466	136	11	16	2590699	2590931	233	10	16	1754269	1754557	289	11	16	1048564	1048910	347	11	16	803971	804456	486	11	16	2138830	2139189	360	11	16	1539547	1540038	492	11
17	2765913	2765963	51	10	17	2650273	2650384	112	11	17	2591312	2591532	221	11	17	1897029	1897284	256	10	17	1077723	1078116	394	10	17	987505	987860	356	11	17	2139854	2140359	506	11	17	1754069	1754817	749	11
18	2766073	2766162	90	11	18	2650681	2650781	101	10	18	2614800	2615099	300	11	18	1980762	1981104	343	10	18	1328075	1328365	291	10	18	1048514	1048960	447	11	18	2152447	2152826	380	11	18	1817807	1818239	433	11
19	2766361	2766455	95	11	19	2650952	2651130	179	12	19	2620693	2620842	150	10	19	2136835	2137063	229	10	19	1478894	1479144	251	10	19	1077673	1078166	494	10	19	2290479	2290873	395	11	19	2008348	2008805	458	11
20	2766534	2766605	72	11	20	2651378	2651588	211	12	20	2621241	2621390	150	10	20	2138980	2139274	295	10	20	1488799	1489057	259	10	20	1327914	1328415	502	10	20	2366806	2367160	355	11	20	2136635	2137156	522	11
21	2766975	2767028	54	9	21	2651822	2651924	103	10	21	2621463	2621701	239	10	21	2139969	2140353	385	11	21	1500659	1501106	448	10	21	1457045	1457352	308	10	21	2493686	2494117	432	11	21	2138780	2139239	460	11
22	2767070	2767120	51	9	22	2652309	2652457	149	11	22	2622894	2623116	223	10	22	2152597	2152926	330	10	22	1539697	1539973	277	10	22	1478844	1479194	351	10	22	2496128	2496673	546	11	22	2139804	2140409	606	11
23	2767417	2767479	63	10	23	2653261	2653450	190	12	23	2623124	2623328	205	11	23	2156328	2156645	318	10	23	1593554	1593820	267	10	23	1488749	1489107	359	10	23	2512908	2513297	390	11	23	2152397	2152876	480	11
24	2767879	2768022	144	12	24	2656191	2656296	106	10	24	2624463	2624731	269	11	24	2493746	2493967	222	10	24	1679813	1680232	420	10	24	1500609	1501156	548	10	24	2513307	2513926	620	11	24	2290429	2290992	564	11
25	2768484	2768555	72	11	25	2657502	2657644	143	10	25	2628476	2628662	187	10	25	2496278	2496523	246	11	25	1754219	1754704	486	11	25	1504082	1504388	307	10	25	2532730	2533089	360	11	25	2366756	2367210	455	11
26	2768873	2768986	114	12	26	2658382	2658632	251	12	26	2630492	2630703	212	11	26	2507161	2507494	334	10	26	1896979	1897334	356	10	26	1539647	1540023	377	10	26	2551478	2551898	421	11	26	2491578	2491992	415	11
27	2769194	2769346	153	12	27	2660056	2660375	320	11	27	2637513	2637710	198	10	27	2512652	2512858	207	10	27	1980712	1981154	443	10	27	1593504	1593870	367	10	27	2553774	2554137	364	11	27	2493546	2494167	622	12
28	2772660	2772731	72	11	28	2665607	2665737	131	11	28	2641471	2641907	437	12	28	2513457	2513776	320	10	28	2032685	2032995	311	10	28	1679684	1680282	599	10	28	2569861	2570288	428	11	28	2496078	2496723	646	11
29	2772771	2772884	114	11	29	2756592	2756730	139	12	29	2646161	2646632	472	12	29	2580608	2580877	270	10	29	2106293	2106585	293	10	29	1754169	1754754	586	11	29	2580568	2581027	460	11	29	2512858	2513976	1119	11
30	2773067	2773166	100	10	30	2758683	2758794	112	11	30	2646738	2647092	355	11	30	2589212	2589754	543	12	30	2136785	2137113	329	10	30	1817907	1818211	305	10	30	2589062	2589885	824	12	30	2529923	2530364	442	11
31	2773302	2773367	66	10	31	2761355	2761490	136	10	31	2647095	2647273	179	10	31	2590617	2590981	365	10	31	2138930	2139386	457	10	31	1896929	1897384	456	10	31	2591013	2591585	573	12	31	2531281	2531701	421	11
32	2773401	2773454	54	10	32	2762587	2762785	199	12	32	2647281	2647516	236	11	32	2591229	2591582	354	12	32	2139919	2140403	485	11	32	1980662	1981204	543	10	32	2614706	2616411	1706	12	32	2532582	2533139	558	12
33	2788307	2788402	96	11	33	2763143	2763268	126	11	33	2650223	2650435	213	11	33	2614750	2615149	400	11	33	2152547	2152976	430	10	33	2032635	2033045	411	10	33	2618852	2619202	351	11	33	2551428	2551948	521	11
34	2868185	2868234	50	11	34	2763426	2763930	505	12	34	2650514	2650852	339	12	34	2615431	2615700	270	11	34	2156278	2156695	418	10	34	2106243	2106635	393	10	34	2619415	2619842	428	11	34	2553724	2554187	464	11
35	3512696	3512746	51	10	35	2763939	2764589	651	12	35	2650893	2651235	343	12	35	2620224	2620424	201	10	35	2272990	2273267	278	10	35	2136735	2137163	429	11	35	2620589	2621096	508	11	35	2566344	2566749	406	11
36	3513897	3513962	66	10	36	2764616	2764991	376	11	36	2651318	2651698	381	12	36	2620635	2620946	312	11	36	2366906	2367182	277	10	36	2138880	2139436	557	10	36	2621140	2621901	762	12	36	2569811	2570338	528	11
37	3514080	3514130	51	10	37	2765003	2765189	187	12	37	2651749	2651974	226	11	37	2621162	2621751	590	11	37	2493696	2494017	322	10	37	2139869	2140453	585	11	37	2622063	2622773	711	11	37	2570922	2571353	432	11
38	3514161	3514217	57	10	38	2765258	2765556	299	12	38	2652030	2652544	515	12	38	2622099	2622332	234	10	38	2496228	2496573	346	11	38	2152497	2153026	530	10	38	2622803	2623712	910	11	38	2580518	2581107	590	11
39	5291858	5291908	51	10	39	2765694	2766682	989	12	39	2653211	2653500	290	12	39	2622375	2622674	300	11	39	2507111	2507544	434	10	39	2156147	2156745	599	10	39	2624245	2624931	687	11	39	2589012	2589935	924	12
40	5473075	5473128	54	9	40	2766741	2767170	430	11	40	2654192	2654357	166	10	40	2622844	2623378	535	11	40	2512602	2512908	307	10	40	2270213	2270616	404	10	40	2627959	2628334	376	11	40	2590771	2591635	865	12
41	5474494	5474553	60	9	41	2767226	2767688	463	12	41	2654375	2654556	182	12	41	2624413	2624781	369	11	41	2513407	2513826	420	11	41	2272060	2272400	341	10	41	2628395	2628879	485	11	41	2614500	2616461	1962	13
42	5491465	5491529	65	10	42	2767808	2768078	271	12	42	2654687	2655048	362	11	42	2628426	2628758	333	11	42	2566350	2566599	250	10	42	2272940	2273317	378	10	42	2629613	2631607	1995	12	42	2617415	2617831	417	11
					43	2768245	2768713	469	12	43	2656085	2656346	262	11	43	2628968	2629202	235	10	43	2570163	2570431	269	10	43	2301558	2301876	319	10	43	2637313	2637850	538	11	43	2618802	2619252	451	11
					44	2768809	2769042	234	12	44	2657452	2657694	243	10	44	2629772	2629978	207	11	44	2577568	2577856	289	10	44	2366781	2367232	452	11	44	2641162	2642791	1630	12	44	2619365	2619892	528	11
					45	2769048	2769396	349	12	45	2658003	2658301	299	11	45	2630072	2630308	237	10	45	2580558	2580957	400	11	45	2492188	2492497	310	10	45	2644471	2644865	395	12	45	2620539	2621951	1413	12
					46	2772610	2772940	331	11	46	2658312	2658682	371	12	46	2630442	2630753	312	12	46	2589162	2589804	643	12	46	2493646	2494067	422	11	46	2645524	2648551	3028	12	46	2622013	2623762	1750	11
					47	2773017	2773504	488	11	47	2660006	2660425	420	11	47	2630855	2631259	405	12	47	2590567	2591031	465	10	47	2496178	2496623	446	11	47	2648799	2649189	391	11	47	2624195	2624981	787	11
					48	2788290	2788467	178	11	48	2662320	2662602	283	11	48	2637419	2637760	342	11	48	2591071	2591632	562	12	48	2507061	2507594	534	10	48	2650000	2655082	5083	13	48	2627909	2628929	1021	12
					49	2814399	2814522	124	10	49	2665557	2665787	231	12	49	2641312	2642158	847	12	49	2592390	2592687	298	10	49	2512552	2512958	407	10	49	2655941	2656465	525	11	49	2629563	2631657	2095	12
					50	2822122	2822265	144	10	50	2724063	2724268	206	11	50	2646111	2646682	572	12	50	2614700	2615199	500	11	50	2513357	2513876	520	11	50	2657360	2658871	1512	12	50	2637263	2637900	638	11
					51	2825006	2825120	115	10	51	2756380	2756831	452	12	51	2646688	2647623	936	11	51	2615381	2616071	691	12	51	2529955	2530264	310	10	51	2659928	2660626	699	11	51	2641112	2642841	1730	12
					52	2827453	2827555	103	10	52	2758597	2758844	248	11	52	2648003	2648248	246	10	52	2619515	2619773	259	10	52	2532622	2532928	307	10	52	2662120	2662802	683	11	52	2644421	2644915	495	12
					53	2831452	2831596	145	10	53	2761227	2761540	314	11	53	2648838	2649039	202	10	53	2620141	2620474	334	10	53	2551528	2551848	321	11	53	2665333	2666290	958	12	53	2645252	2648601	3350	12
					54	2831933	2832046	114	10	54	2762444	2763318	875	12	54	2650150	2652683	2534	12	54	2620534	2620996	463	11	54	2566300	2566649	350	10	54	2723863	2724553	691	11	54	2648749	2649239	491	11
					55	2832082	2832235	154	10	55	2763376	2765606	2231	12	55	2653159	2653553	395	12	55	2621112	2622724	1613	12	55	2569883	2570481	599	11	55	2724555	2724922	368	11	55	2649950	2655132	5183	13
					56	2832397	2832622	226	11	56	2765644	2769446	3803	12	56	2653797	2654042	246	10	56	2622794	2623572	779	11	56	2577518	2577906	389	10	56	2730856	2731809	954	12	56	2655891	2656515	625	11
					57	2833027	2833219	193	10	57	2772560	2773554	995	11	57	2654142	2654606	465	12	57	2624363	2624831	469	11	57	2580508	2581007	500	11	57	2756180	2756983	804	12	57	2657310	2658921	1612	12
					58	2833793	2833947	155	11	58	2788240	2788598	359	11	58	2654637	2655098	462	11	58	2628142	2629252	1111	11	58	2581226	2581566	341	10	58	2758334	2759131	798	11	58	2659878	2660676	799	11
					59	2835127	2835235	109	10	59	2814349	2814572	224	11	59	2655265	2655516	252	10	59	2629713	2630358	646	11	59	2589112	2589854	743	12	59	2760784	2761767	984	12	59	2662070	2662852	783	11
					60	2837650	2837758	109	10	60	2821299	2821474	176	10	60	2655998	2656396	399	11	60	2630392	2631309	918	12	60	2590517	2591682	1166	12	60	2762040	2769646	7607	12	60	2663853	2664271	419	11
					61	2837893	2838004	112	10	61	2821659	2821909	251	10	61	2657402	2657755	354	11	61	2631342	2631684	343	10	61	2592340	2592737	398	10	61	2772330	2773700	1371	11	61	2665283	2666340	1058	12
					62	2844588	2844696	109	10	62	2822046	2822315	270	11	62	2657953	2658732	780	12	62	2637369	2637810	442	11	62	2614515	2615249	735	12	62	2788001	2788720	720	12	62	2723813	2724972	1160	11
					63	2846105	2846205	101	10	63	2824923	2825182	260	10	63	2659956	2660475	520	11	63	2641262	2642229	968	12	63	2615331	2616363	1033	12	63	2814149	2815126	978	12	63	2725781	2726191	411	11
					64	2851126	2851238	113	10	64	2827403	2827646	244	11	64	2660994	2661392	399	10	64	2642394	2642691	298	11	64	2619465	2619823	359	11	64	2816110	2816520	411	11	64	2727549	2727980	432	11
					65	2854248	2854434	187	11	65	2830413	2830567	155	10	65	2662270	2662652	383	11	65	2645611	2645888	278	11	65	2620091	2621046	956	11	65	2820406	2820879	474	11	65	2730806	2731859	1054	12
					66	2868135	2868284	150	11	66	2831402	2831646	245	10	66	2665439	2665837	399	12	66	2646061	2647673	1613	12	66	2621062	2623662	2601	12	66	2821156	2822544	1389	11	66	2756130	2757033	904	12
					67	2871814	2871946	133	10	67	2831883	2832681	799	12	67	2665931	2666140	210	11	67	2647695	2648451	757	11	67	2624271	2624881	611	11	67	2824723	2825382	660	11	67	2758284	2759184	901	11
					68	2945665	2945767	103	10	68	2832890	2833269	380	11	68	2720423	2720639	217	10	68	2648788	2649089	302	10	68	2628009	2629302	1294	12	68	2827164	2827763	600	11	68	2760734	2761817	1084	12
					69	2946152	2946251	100	10	69	2833699	2834028	330	11	69	2724013	2724318	306	11	69	2650100	2652733	2634	12	69	2629663	2631734	2072	12	69	2831832	2834197	2366	12	69	2761990	2769696	7707	12
					70	2946635	2946743	109	10	70	2835077	2835285	209	10	70	2724738	2725049	312	10	70	2652742	2653624	883	13	70	2637319	2637860	542	11	70	2837400	2838098	699	12	70	2772280	2773750	1471	11
					71	2946845	2946947	103	10	71	2837600	2837808	209	10	71	2731006	2731257	252	11	71	2653735	2655566	1832	12	71	2639312	2639702	391	10	71	2842962	2843582	621	12	71	2787951	2788770	820	12
					72	2957685	2957791	107	10	72	2837843	2838054	212	10	72	2731443	2731659	217	10	72	2655948	2656446	499	11	72	2641212	2642279	1068	12	72	2847280	2847978	699	12	72	2814099	2815176	1078	12
					73	3411865	3411977	113	10	73	2843055	2843225	171	10	73	2756324	2756881	558	12	73	2656819	2657805	987	12	73	2642344	2642741	398	11	73	2849780	2850359	580	12	73	2815918	2816570	653	11
					74	3512646	3512796	151	10	74	2843294	2843460	167	10	74	2758547	2758945	399	11	74	2657903	2658782	880	12	74	2644470	2644795	326	10	74	2850404	2851515	1112	12	74	2820356	2820929	574	12
					75	3513847	3514267	421	10	75	2844538	2844839	302	10	75	2761177	2761617	441	11	75	2659906	2660526	621	11	75	2645523	2648501	2979	12	75	2853998	2854655	658	11	75	2821106	2822594	1489	11
					76	3521343	3521442	100	10	76	2844934	2845118	185	10	76	2762394	2769496	7103	12	76	2660944	2661442	499	10	76	2648738	2649139	402	10	76	2856208	2857528	1321	12	76	2824673	2825432	760	11
					77	3928240	3928363	124	10	77	2846055	2846369	315	10	77	2772510	2773604	1095	11	77	2662220	2662702	483	11	77	2650044	2655616	5573	13	77	2858384	2859092	709	11	77	2827114	2827813	700	11
					78	3973280	3973383	104	10	78	2851076	2851312	237	11	78	2788190	2788648	459	11	78	2664003	2664497	495	10	78	2655898	2656589	692	11	78	2867885	2868534	650	11	78	2831782	2834247	2466	12
					79	5241135	5241285	151	11	79	2854157	2854490	334	11	79	2814299	2814622	324	11	79	2665357	2666190	834	12	79	2656769	2658832	2064	12	79	2944552	2945358	807	11	79	2837350	2838148	799	12
					80	5242048	5242203	156	10	80	2856383	2856569	187	11	80	2814728	2814976	249	11	80	2720373	2720689	317	10	80	2659856	2660607	752	11	80	2945808	2947475	1668	12	80	2842912	2843632	721	12
					81	5275753	5275894	142	10	81	2856802	2857202	401	12	81	2815927	2816127	201	10	81	2723963	2724461	499	11	81	2660894	2661492	599	10	81	2947669	2948109	441	11	81	2847230	2848028	799	12
					82	5337874	5338000	127	10	82	2858637	2858892	256	10	82	2821249	2821959	711	11	82	2724688	2725099	412	10	82	2662170	2663079	910	11	82	2948514	2948922	409	11	82	2849730	2851565	1836	12
					83	5406986	5407109	124	10	83	2868085	2868334	250	11	83	2821996	2822365	370	11	83	2730956	2731709	754	12	83	2663953	2664547	595	10	83	2949351	2949929	579	12	83	2853948	2854705	758	11
					84	5408479	5408599	121	10	84	2871413	2871565	153	10	84	2824873	2825232	360	11	84	2756274	2756931	658	12	84	2665307	2666240	934	12	84	2957575	2958042	468	11	84	2856158	2857578	1421	12
					85	5415459	5415615	157	10	85	2871764	2871996	233	10	85	2827353	2827696	344	11	85	2758497	2758995	499	11	85	2666353	2666654	302	10	85	2958969	2959436	468	11	85	2858334	2859142	809	11
					86	5429656	5429791	136	10	86	2945592	2945817	226	10	86	2830363	2830617	255	10	86	2759909	2760205	297	10	86	2720323	2720739	417	10	86	2991288	2991758	471	11	86	2867835	2868584	750	11
					87	5445697	5445868	172	12	87	2946102	2946306	205	12	87	2831340	2831696	357	10	87	2761040	2761685	646	12	87	2723913	2724511	599	11	87	2993330	2993698	369	11	87	2869128	2869539	412	11
					88	5446003	5446300	298	12	88	2946555	2946997	443	12	88	2831833	2832737	905	12	88	2762335	2769546	7212	12	88	2724617	2725149	533	10	88	2995280	2995870	591	11	88	2871514	2871951	438	11
					89	5458354	5458474	121	10	89	2949551	2949713	163	10	89	2832771	2833319	549	11	89	2772460	2773654	1195	11	89	2725748	2726055	308	10	89	3001951	3002305	355	11	89	2892607	2893047	441	11
					90	5472069	5472197	129	10	90	2951455	2951609	155	10	90	2833649	2834078	430	11	90	2788101	2788698	598	12	90	2730855	2731759	905	12	90	3054515	3055096	582	12	90	2944502	2945408	907	11
					91	5473016	5473214	199	10	91	2957635	2957842	208	10	91	2835000	2835386	387	10	91	2814249	2814672	424	11	91	2756224	2756981	758	12	91	3060881	3061335	455	11	91	2945758	2947525	1768	12
					92	5474420	5474573	154	11	92	2995480	2995670	191	11	92	2837550	2838104	555	12	92	2814678	2815026	349	11	92	2758384	2759048	665	11	92	3066353	3066994	642	13	92	2947619	2948159	541	11
					93	5481314	5481455	142	10	93	3061124	3061276	153	10	93	2843005	2843510	506	12	93	2815871	2816177	307	10	93	2759290	2759597	308	10	93	3411692	3412227	536	11	93	2948464	2948973	510	11
					94	5491412	5491579	168	10	94	3236185	3236363	179	10	94	2844488	2845249	762	10	94	2820341	2820779	439	12	94	2759859	2760255	397	10	94	3525270	3525656	387	11	94	2949301	2949979	679	12
										95	3411815	3412081	267	11	95	2845934	2846419	486	10	95	2821199	2822444	1246	11	95	2760829	2761735	907	12	95	3610442	3610896	455	11	95	2957525	2958092	568	11
										96	3512335	3512513	179	10	96	2847640	2847910	271	10	96	2824823	2825282	460	11	96	2762285	2769596	7312	12	96	3666974	3667436	463	11	96	2958919	2959486	568	11
										97	3512596	3512846	251	10	97	2849921	2850169	249	11	97	2827248	2827746	499	11	97	2772095	2773704	1610	11	97	3784366	3784804	439	11	97	2991238	2991808	571	11
										98	3513758	3514359	602	10	98	2850971	2851365	395	12	98	2829791	2830063	273	10	98	2788051	2788748	698	12	98	3789427	3789876	450	11	98	2993280	2993748	469	11
										99	3521250	3521492	243	10	99	2852712	2852993	282	10	99	2830313	2830667	355	10	99	2814199	2815076	878	12	99	3833538	3833975	438	11	99	2995230	2995920	691	11
										100	3525904	3526073	170	10	100	2853117	2853362	246	10	100	2831290	2831746	457	10	100	2815821	2816470	650	11	100	3845263	3845833	571	11	100	3001901	3002376	476	11
										101	3814960	3815228	269	10	101	2854107	2854540	434	11	101	2831783	2833369	1587	12	101	2820289	2820829	541	12	101	3849031	3849605	575	11	101	3054465	3055146	682	12
										102	3849242	3849405	164	10	102	2856333	2856666	334	11	102	2833599	2834128	530	11	102	2820954	2822494	1541	11	102	3954373	3954722	350	11	102	3055701	3056122	422	11
										103	3928190	3928475	286	10	103	2856752	2857300	549	12	103	2834950	2835436	487	10	103	2824773	2825332	560	11	103	3956158	3956524	367	11	103	3060831	3061385	555	11
										104	3956358	3956533	176	10	104	2858363	2858980	618	11	104	2835727	2836015	289	10	104	2827198	2827796	599	11	104	3985198	3985713	516	11	104	3066303	3067044	742	13
										105	3966337	3966486	150	10	105	2861774	2862004	231	10	105	2837500	2838166	667	12	105	2829741	2830113	373	10	105	3986785	3987153	369	11	105	3411507	3412363	857	12
										106	3973203	3973433	231	10	106	2868035	2868384	350	11	106	2842955	2843560	606	12	106	2830263	2830720	458	10	106	3991259	3991990	732	11	106	3525220	3525706	487	11
										107	3991546	3991736	191	10	107	2869105	2869339	235	10	107	2844438	2845299	862	10	107	2831240	2834178	2939	12	107	3993407	3993790	384	11	107	3610392	3610946	555	11
										108	4120519	4120740	222	10	108	2871363	2871671	309	10	108	2845473	2845788	316	10	108	2834900	2835486	587	10	108	4215093	4215494	402	11	108	3666883	3667486	604	11
										109	4218927	4219150	224	10	109	2871714	2872046	333	10	109	2845872	2846712	841	10	109	2835677	2836236	560	10	109	4218452	4219150	699	12	109	3701288	3701704	417	11
										110	4326251	4326404	154	11	110	2892939	2893148	210	10	110	2847380	2847960	581	11	110	2836595	2836908	314	10	110	4326051	4326604	554	11	110	3784316	3784854	539	11
										111	4419943	4420143	201	10	111	2944865	2945208	344	11	111	2848394	2848667	274	10	111	2837450	2838216	767	12	111	4420619	4421158	540	11	111	3789377	3789926	550	11
										112	4435709	4435872	164	10	112	2945419	2945867	449	10	112	2849402	2849671	270	10	112	2841925	2842268	344	10	112	4421185	4421538	354	11	112	3815065	3815478	414	11
										113	4482849	4483006	158	10	113	2945958	2946356	399	12	113	2849871	2850366	496	12	113	2842905	2843610	706	12	113	4665205	4665633	429	11	113	3818314	3818737	424	11
										114	4754776	4754927	152	10	114	2946448	2947325	878	12	114	2850890	2851468	579	12	114	2844388	2845349	962	10	114	4665673	4666140	468	11	114	3833488	3834025	538	11
										115	5015454	5015622	169	10	115	2949501	2949763	263	10	115	2852662	2853043	382	10	115	2845423	2846762	1340	11	115	4754534	4755075	542	11	115	3845213	3845883	671	11
										116	5177689	5177910	222	10	116	2951405	2951659	255	10	116	2853067	2853412	346	10	116	2847255	2848010	756	12	116	4774204	4774772	569	12	116	3848962	3849760	799	11
										117	5230736	5230933	198	10	117	2957563	2957892	330	10	117	2854057	2854590	534	11	117	2848304	2848717	414	10	117	5001736	5002114	379	11	117	3905939	3906374	436	11
										118	5239527	5239688	162	10	118	2979177	2979418	242	10	118	2856283	2857350	1068	12	118	2849275	2849721	447	10	118	5015320	5015825	506	11	118	3954323	3954772	450	11
										119	5240550	5240762	213	11	119	2995430	2995720	291	11	119	2858313	2859030	718	11	119	2849821	2850416	596	12	119	5024080	5024539	460	11	119	3956108	3956574	467	11
										120	5241031	5241392	362	11	120	3056261	3056464	204	10	120	2861724	2862099	376	10	120	2850478	2851596	1119	12	120	5126295	5126648	354	11	120	3966318	3966736	419	11
										121	5241904	5242253	350	11	121	3061031	3061339	309	10	121	2867985	2868434	450	11	121	2852612	2853462	851	11	121	5227384	5227750	367	11	121	3985148	3985763	616	11
										122	5266531	5266743	213	11	122	3236135	3236413	279	10	122	2869055	2869389	335	10	122	2854007	2854640	634	11	122	5230486	5231019	534	11	122	3986735	3987203	469	11
										123	5268936	5269093	158	10	123	3411765	3412131	367	11	123	2871313	2872096	784	11	123	2856233	2857400	1168	12	123	5240350	5241592	1243	11	123	3991209	3992040	832	11
										124	5269487	5269678	192	10	124	3463603	3463829	227	10	124	2892832	2893198	367	10	124	2858263	2859080	818	11	124	5241758	5242453	696	11	124	3993357	3993840	484	11
										125	5273370	5273652	283	10	125	3512285	3512896	612	10	125	2944557	2947376	2820	12	125	2861647	2862149	503	10	125	5243646	5244049	404	11	125	4047435	4047850	416	11
										126	5274938	5275107	170	10	126	3513663	3514551	889	10	126	2949451	2949942	492	11	126	2862265	2862611	347	10	126	5265516	5266026	511	11	126	4214821	4215544	724	11
										127	5275379	5275545	167	10	127	3521200	3521542	343	10	127	2951355	2951709	355	10	127	2867935	2868484	550	11	127	5266331	5267036	706	12	127	4218402	4219200	799	12
										128	5275676	5275944	269	10	128	3525850	3526123	274	10	128	2957513	2957946	434	11	128	2868841	2869603	763	11	128	5268727	5269266	540	11	128	4265770	4266184	415	11
										129	5276004	5276188	185	10	129	3667083	3667286	204	10	129	2959069	2959342	274	11	129	2871263	2872434	1172	11	129	5269534	5269921	388	11	129	4326001	4326654	654	11
										130	5287597	5287757	161	10	130	3814910	3815278	369	10	130	2979127	2979468	342	10	130	2892515	2893248	734	11	130	5273331	5273852	522	11	130	4420569	4421589	1021	12
										131	5289147	5289319	173	10	131	3845131	3845361	231	10	131	2991388	2991658	271	11	131	2944363	2947426	3064	12	131	5275690	5276430	741	12	131	4429406	4429839	434	11
										132	5299177	5299472	296	10	132	3849181	3849560	380	11	132	2995380	2995878	499	11	132	2947716	2948059	344	11	132	5289974	5290325	352	11	132	4665155	4666190	1036	11
										133	5300523	5300803	281	11	133	3928140	3928525	386	10	133	3053705	3054013	309	10	133	2948558	2948872	315	11	133	5295647	5296332	686	12	133	4754484	4755125	642	11
										134	5337819	5338050	232	10	134	3949331	3949729	399	10	134	3054705	3054996	292	10	134	2949401	2949992	592	11	134	5297993	5298535	543	13	134	4773481	4773910	430	11
										135	5340492	5340790	299	11	135	3956308	3956583	276	10	135	3056211	3056514	304	10	135	2951305	2951822	518	10	135	5298977	5300169	1193	12	135	4774154	4774822	669	12
										136	5406936	5407170	235	10	136	3966287	3966536	250	10	136	3057168	3057438	271	10	136	2957463	2958014	552	11	136	5300257	5300950	694	11	136	5001686	5002164	479	11
										137	5408276	5408658	383	11	137	3968196	3968399	204	10	137	3060981	3061389	409	11	137	2959019	2959392	374	11	137	5340363	5340990	628	11	137	5013033	5013753	721	11
										138	5415385	5415922	538	11	138	3973120	3973483	364	10	138	3066120	3066375	256	10	138	2973961	2974283	323	10	138	5408209	5408858	650	11	138	5015270	5015875	606	11
										139	5429566	5430138	573	11	139	3985348	3985563	216	11	139	3066453	3066894	442	12	139	2979077	2979518	442	10	139	5414825	5415274	450	11	139	5024030	5024589	560	11
										140	5445647	5446350	704	12	140	3991496	3991840	345	10	140	3236073	3236463	391	10	140	2991144	2991708	565	11	140	5415339	5416373	1035	11	140	5126245	5126698	454	11
										141	5446463	5446650	188	10	141	4045777	4046123	347	10	141	3411715	3412181	467	11	141	2995330	2995928	599	11	141	5429217	5429915	699	11	141	5227334	5227800	467	11
										142	5451596	5451815	220	12	142	4120469	4120790	322	10	142	3463553	3463879	327	10	142	3053641	3054063	423	10	142	5429988	5430359	372	11	142	5230436	5231069	634	11
										143	5458302	5458524	223	12	143	4218877	4219200	324	10	143	3512235	3512946	712	10	143	3054655	3055046	392	11	143	5445492	5446853	1362	12	143	5232834	5233271	438	11
										144	5472018	5472247	230	11	144	4326201	4326454	254	11	144	3513613	3514601	989	10	144	3055801	3056143	343	10	144	5446874	5448487	1614	12	144	5239557	5239958	402	11
										145	5472966	5473305	340	10	145	4419893	4420193	301	10	145	3515776	3516032	257	10	145	3056161	3056564	404	10	145	5448590	5449039	450	12	145	5240300	5241642	1343	11
										146	5473731	5474005	275	11	146	4435659	4435952	294	10	146	3521150	3521593	444	10	146	3057118	3057488	371	10	146	5450471	5450950	480	11	146	5241708	5242533	826	11
										147	5474370	5474668	299	11	147	4482799	4483056	258	10	147	3524870	3525153	284	10	147	3060931	3061439	509	11	147	5451083	5451991	909	12	147	5243596	5244099	504	11
										148	5481264	5481562	299	10	148	4629317	4629536	220	10	148	3525735	3526173	439	10	148	3066070	3066944	875	13	148	5456141	5456494	354	11	148	5261427	5261830	404	11
										149	5490167	5490370	204	11	149	4665238	4665483	246	10	149	3610542	3610796	255	10	149	3164553	3164885	333	11	149	5458102	5458800	699	12	149	5265466	5267086	1621	12
										150	5491362	5491629	268	10	150	4754684	4754977	294	11	150	3667033	3667336	304	11	150	3236023	3236513	491	10	150	5461155	5461552	398	11	150	5267783	5268213	431	11
										151	5492621	5492784	164	10	151	4893630	4893959	330	10	151	3706868	3707148	281	11	151	3411665	3412231	567	11	151	5471819	5472398	580	11	151	5268677	5269316	640	11
										152	5492978	5493167	190	10	152	5013551	5013783	233	10	152	3761659	3761909	251	10	152	3463503	3463929	427	10	152	5472766	5473191	426	11	152	5269484	5269971	488	11
															153	5014034	5014249	216	10	153	3781417	3781676	260	10	153	3512185	3512996	812	10	153	5473232	5474080	849	11	153	5273120	5273902	783	11
															154	5015368	5015675	308	11	154	3784432	3784752	321	11	154	3513563	3514651	1089	10	154	5474170	5474853	684	11	154	5275640	5276480	841	12
															155	5024093	5024388	296	10	155	3798946	3799215	270	10	155	3514745	3515088	344	10	155	5489967	5490585	619	12	155	5289924	5290375	452	11
															156	5177639	5177960	322	10	156	3814860	3815328	469	10	156	3515726	3516082	357	10	156	5491162	5491680	519	11	156	5295597	5296382	786	12
															157	5224765	5225088	324	10	157	3833602	3833896	295	11	157	3521100	3521667	568	10	157	5492365	5493395	1031	12	157	5297943	5298684	742	13
															158	5230585	5230983	399	11	158	3845048	3845820	773	11	158	3524820	3525203	384	10						158	5298909	5301000	2092	12
															159	5239477	5239738	262	10	159	3849131	3849610	480	11	159	3525685	3526254	570	10						159	5340313	5341040	728	11
															160	5240500	5240871	372	11	160	3902167	3902443	277	10	160	3610297	3610846	550	11						160	5406686	5407109	424	11
															161	5240981	5241442	462	11	161	3905952	3906224	273	10	161	3666983	3667386	404	11						161	5408159	5408908	750	11
															162	5241773	5242651	879	11	162	3928090	3928575	486	10	162	3706818	3707198	381	11						162	5414775	5416423	1649	11
															163	5243534	5243776	243	10	163	3934946	3935209	264	10	163	3761495	3761959	465	10						163	5429167	5430409	1243	11
															164	5265528	5265876	349	11	164	3949281	3949779	499	10	164	3781367	3781726	360	10						164	5445442	5449089	3648	12
															165	5266481	5266832	352	12	165	3951749	3952037	289	10	165	3784382	3784802	421	11						165	5450421	5451000	580	11
															166	5268877	5269143	267	11	166	3955926	3956205	280	10	166	3789462	3789826	365	11						166	5451033	5452041	1009	12
															167	5269437	5269728	292	10	167	3956258	3956633	376	10	167	3798896	3799265	370	10						167	5456091	5456706	616	12
															168	5273320	5273718	399	11	168	3966237	3966586	350	10	168	3814810	3815378	569	10						168	5458052	5458850	799	12
															169	5274849	5275157	309	10	169	3968146	3968596	451	10	169	3833552	3833946	395	11						169	5461105	5461602	498	11
															170	5275329	5275595	267	10	170	3973070	3973533	464	10	170	3843409	3843734	326	10						170	5471769	5472448	680	11
															171	5275626	5276309	684	12	171	3985298	3985613	316	11	171	3844998	3845870	873	11						171	5472716	5474921	2206	11
															172	5276935	5277144	210	10	172	3991446	3991890	445	11	172	3849081	3849660	580	11						172	5481014	5481414	401	11
															173	5287501	5287807	307	10	173	4045727	4046173	447	10	173	3902117	3902529	413	10						173	5489917	5490635	719	12
															174	5289070	5289369	300	10	174	4120419	4120840	422	10	174	3905902	3906274	373	10						174	5491112	5491730	619	11
															175	5295925	5296155	231	11	175	4207373	4207649	277	10	175	3911316	3911640	325	10						175	5492315	5493445	1131	12
															176	5299109	5299652	544	11	176	4218827	4219250	424	10	176	3928040	3928625	586	10
															177	5300473	5300853	381	11	177	4228707	4228971	265	10	177	3934896	3935311	416	10
															178	5337769	5338100	332	10	178	4265920	4266184	265	10	178	3949231	3949829	599	10
															179	5340442	5340840	399	11	179	4326151	4326504	354	11	179	3951168	3951487	320	10
															180	5406886	5407220	335	10	180	4419843	4420243	401	10	180	3951699	3952087	389	10
															181	5408226	5408711	486	11	181	4429616	4429909	294	10	181	3954582	3954888	307	10
															182	5414879	5415101	223	10	182	4435609	4436002	394	10	182	3955876	3956683	808	11
															183	5415335	5415972	638	11	183	4482749	4483106	358	10	183	3963912	3964222	311	10
															184	5429516	5430354	839	11	184	4629267	4629586	320	10	184	3966187	3966636	450	10
															185	5445597	5446709	1113	12	185	4664482	4664747	266	10	185	3968096	3968646	551	10
															186	5447666	5447866	201	11	186	4665188	4665602	415	11	186	3972327	3972646	320	10
															187	5447972	5448337	366	12	187	4665773	4666040	268	11	187	3972703	3973583	881	11
															188	5451233	5451865	633	12	188	4682765	4683031	267	10	188	3985239	3985663	425	11
															189	5458252	5458610	359	12	189	4754634	4755027	394	11	189	3986619	3986956	338	10
															190	5471968	5472297	330	11	190	4836678	4836935	258	10	190	3991309	3991940	632	11
															191	5472916	5473355	440	10	191	4893564	4894021	458	10	191	3995069	3995383	315	10
															192	5473532	5474074	543	11	192	5013501	5013833	333	10	192	4045677	4046223	547	10
															193	5474320	5474718	399	11	193	5013984	5014299	316	10	193	4120295	4120890	596	10
															194	5481214	5481612	399	10	194	5015237	5015725	489	11	194	4207320	4207699	380	10
															195	5484779	5484991	213	10	195	5024043	5024468	426	11	195	4214963	4215444	482	11
															196	5490117	5490435	319	12	196	5034926	5035208	283	10	196	4218726	4219300	575	12
															197	5491281	5491679	399	11	197	5035389	5035664	276	10	197	4228657	4229021	365	10
															198	5492571	5492834	264	11	198	5098547	5098814	268	10	198	4265718	4266245	528	12
															199	5492928	5493245	318	11	199	5177589	5178010	422	10	199	4326101	4326554	454	11
																				200	5224709	5225138	430	10	200	4419793	4420293	501	10
																				201	5227484	5227755	272	10	201	4420554	4421108	555	11
																				202	5230421	5231033	613	11	202	4421282	4421590	309	10
																				203	5239288	5239788	501	10	203	4429510	4429959	450	10
																				204	5240450	5241492	1043	11	204	4435559	4436052	494	10
																				205	5241723	5242701	979	11	205	4482699	4483156	458	10
																				206	5243124	5243826	703	10	206	4629217	4629636	420	10
																				207	5249066	5249318	253	10	207	4633947	4634268	322	10
																				208	5260905	5261184	280	10	208	4664432	4664797	366	10
																				209	5265478	5265926	449	11	209	4665027	4665652	626	11
																				210	5266431	5266882	452	12	210	4665723	4666090	368	11
																				211	5268818	5269225	408	11	211	4668196	4668538	343	10
																				212	5269387	5269821	435	10	212	4682715	4683081	367	10
																				213	5273270	5273768	499	11	213	4754584	4755077	494	11
																				214	5274733	5275207	475	10	214	4774231	4774722	492	11
																				215	5275279	5276359	1081	12	215	4836628	4836985	358	10
																				216	5276885	5277194	310	10	216	4893514	4894071	558	10
																				217	5287451	5287857	407	10	217	4941006	4941308	303	10
																				218	5289020	5289419	400	10	218	5001808	5002126	319	10
																				219	5295875	5296205	331	11	219	5009665	5009969	305	10
																				220	5298141	5298435	295	11	220	5013451	5013883	433	10
																				221	5299059	5299908	850	12	221	5013934	5014349	416	10
																				222	5300148	5300903	756	11	222	5015187	5015775	589	11
																				223	5336923	5337217	295	10	223	5023993	5024518	526	11
																				224	5337719	5338150	432	10	224	5034321	5034658	338	10
																				225	5340392	5340890	499	11	225	5034876	5035258	383	10
																				226	5406836	5407270	435	10	226	5035339	5035714	376	10
																				227	5408176	5408788	613	11	227	5098497	5098864	368	10
																				228	5414829	5415174	346	11	228	5126077	5126598	522	10
																				229	5415285	5416075	791	11	229	5177539	5178060	522	10
																				230	5429181	5430404	1224	11	230	5224656	5225188	533	10
																				231	5445547	5446759	1213	12	231	5227434	5227805	372	10
																				232	5446974	5447265	292	11	232	5230371	5231083	713	11
																				233	5447523	5448387	865	12	233	5232934	5233263	330	10
																				234	5450571	5450850	280	11	234	5239238	5239838	601	10
																				235	5451183	5451915	733	12	235	5240400	5242751	2352	11
																				236	5455343	5455630	288	10	236	5243074	5244080	1007	11
																				237	5456139	5456511	373	11	237	5249007	5249368	362	10
																				238	5458202	5458660	459	12	238	5250822	5251127	306	10
																				239	5463083	5463348	266	10	239	5252721	5253043	323	10
																				240	5471918	5472347	430	11	240	5260855	5261234	380	10
																				241	5472866	5474124	1259	11	241	5265428	5265976	549	11
																				242	5474270	5474771	502	11	242	5266007	5266353	347	10
																				243	5481164	5481662	499	10	243	5266381	5266986	606	12
																				244	5481841	5482120	280	10	244	5267062	5267390	329	10
																				245	5483158	5483422	265	10	245	5267910	5268212	303	10
																				246	5484729	5485041	313	10	246	5268485	5269275	791	11
																				247	5490067	5490485	419	12	247	5269337	5269871	535	10
																				248	5491231	5491886	656	11	248	5273220	5273818	599	11
																				249	5492521	5493295	775	12	249	5274683	5276409	1727	12
																									250	5276835	5277244	410	10
																									251	5278467	5278766	300	10
																									252	5286207	5286512	306	10
																									253	5287401	5287907	507	10
																									254	5288970	5289469	500	10
																									255	5290117	5290454	338	10
																									256	5295825	5296295	471	12
																									257	5298091	5298485	395	12
																									258	5298943	5299979	1037	12
																									259	5300098	5300953	856	11
																									260	5336873	5337467	595	10
																									261	5337669	5338200	532	10
																									262	5340342	5341405	1064	11
																									263	5406786	5407320	535	10
																									264	5408126	5408838	713	11
																									265	5414779	5415224	446	11
																									266	5415235	5416125	891	11
																									267	5429131	5430454	1324	11
																									268	5445497	5446809	1313	12
																									269	5446924	5447393	470	12
																									270	5447473	5448551	1079	12
																									271	5448739	5449055	317	10
																									272	5450521	5450900	380	11
																									273	5451133	5451965	833	12
																									274	5455293	5455680	388	10
																									275	5456089	5456840	752	12
																									276	5457529	5457848	320	10
																									277	5458152	5458785	634	12
																									278	5460607	5460914	308	10
																									279	5461205	5461522	318	10
																									280	5463033	5463488	456	10
																									281	5471868	5472397	530	11
																									282	5472816	5474174	1359	11
																									283	5474220	5474821	602	11
																									284	5481114	5481712	599	10
																									285	5481791	5482170	380	10
																									286	5483108	5483472	365	10
																									287	5484679	5485091	413	10
																									288	5490017	5490535	519	12
																									289	5491181	5491936	756	11
																									290	5492336	5493345	1010	12

## Sheet: Var_fragments_E.faecium
word length 50 bp					word length 100 bp					word length 150 bp					word length 200 bp					word length 250 bp					word length 300 bp					word length 350 bp					word length 400 bp
number	start	stop	length [bp]	clusters	number	start	stop	length [bp]	clusters	number	start	stop	length [bp]	clusters	number	start	stop	length [bp]	clusters	number	start	stop	length [bp]	clusters	number	start	stop	length [bp]	clusters	number	start	stop	length [bp]	clusters	number	start	stop	length [bp]	clusters
1	634361	634459	99	4	1	451368	451485	118	4	1	451318	451535	218	4	1	451268	451585	318	4	1	451218	451635	418	4	1	451168	451685	518	4	1	451118	451735	618	4	1	451068	451785	718	4
2	1285772	1285869	98	4	2	634311	634509	199	4	2	634261	634559	299	4	2	634211	634609	399	4	2	634161	634659	499	4	2	634111	634709	599	4	2	586918	587307	390	4	2	586868	587357	490	4
3	1325591	1325686	96	4	3	642412	642528	117	4	3	641051	641349	299	4	3	641001	641399	399	4	3	640951	641449	499	4	3	640901	641499	599	4	3	608559	608912	354	4	3	608509	608962	454	4
4	2035547	2035630	84	5	4	651072	651191	120	4	4	642280	642578	299	4	4	642230	642628	399	4	4	642180	642678	499	4	4	642130	642728	599	4	4	634061	634759	699	4	4	634011	634809	799	4
5	2041907	2041991	85	5	5	1285722	1285919	198	4	5	643879	644070	192	4	5	643829	644120	292	4	5	643779	644277	499	4	5	643729	644327	599	4	5	640851	641549	699	4	5	640801	641599	799	4
					6	1325541	1325736	196	4	6	651022	651241	220	4	6	650972	651291	320	4	6	650922	651341	420	4	6	650872	651391	520	4	6	642080	642778	699	4	6	642030	642828	799	4
					7	1964522	1964666	145	4	7	1285672	1285969	298	4	7	1285622	1286019	398	4	7	1285572	1286069	498	4	7	1285522	1286119	598	4	7	643679	644377	699	4	7	643629	644427	799	4
					8	2035497	2035695	199	5	8	1325491	1325786	296	4	8	1325441	1325836	396	4	8	1325391	1325886	496	4	8	1325341	1325936	596	4	8	650822	651441	620	4	8	650772	651491	720	4
					9	2041857	2042041	185	5	9	1964472	1964716	245	5	9	1328295	1328538	244	4	9	1328245	1328588	344	4	9	1328195	1328638	444	4	9	1285472	1286169	698	4	9	1285422	1286219	798	4
										10	2035447	2035745	299	5	10	1964368	1964766	399	5	10	1964318	1964816	499	5	10	1964268	1964866	599	5	10	1325291	1325986	696	4	10	1325241	1326036	796	4
										11	2041807	2042091	285	5	11	2035397	2035795	399	5	11	2035347	2035845	499	5	11	2035297	2035895	599	5	11	1328145	1328688	544	4	11	1328095	1328738	644	4
										12	2077971	2078162	192	4	12	2041757	2042141	385	5	12	2041707	2042193	487	5	12	2041657	2042243	587	5	12	1964218	1964916	699	5	12	1964168	1964966	799	5
															13	2046889	2047105	217	5	13	2046839	2047155	317	5	13	2046789	2047384	596	5	13	2035247	2035945	699	5	13	2035197	2035995	799	5
															14	2077921	2078244	324	4	14	2077871	2078294	424	4	14	2077821	2078344	524	4	14	2041607	2042293	687	5	14	2041545	2042343	799	5
																				15	2916663	2916956	294	4	15	2916613	2917006	394	4	15	2046736	2047434	699	5	15	2046686	2047484	799	5
																														16	2077771	2078394	624	4	16	2077721	2078444	724	4
																														17	2916563	2917056	494	4	17	2916513	2917106	594	4

## Sheet: Two_markers_E.coli
number	word length [bp]	number of clusters	start seq1	stop seq1	length seq1 [bp]	start seq2	stop seq2	length seq2 [bp]
1	300	15	434998	435683	686	1327914	1328415	502				correctly classified clusters
2	300	15	434998	435683	686	2614515	2615249	735
3	300	15	434998	435683	686	2650044	2655616	5573
4	300	15	434998	435683	686	2659856	2660607	752
5	300	15	434998	435683	686	2820289	2820829	541
6	300	15	434998	435683	686	2827198	2827796	599
7	300	15	434998	435683	686	2842905	2843610	706
8	300	15	434998	435683	686	2867935	2868484	550
9	300	15	434998	435683	686	3781367	3781726	360
10	300	15	434998	435683	686	3789462	3789826	365
11	300	15	434998	435683	686	3951168	3951487	320
12	300	15	434998	435683	686	5298091	5298485	395
13	300	15	434998	435683	686	5336873	5337467	595
14	350	15	434948	435702	755	2650000	2655082	5083
15	350	15	434948	435702	755	2659928	2660626	699
16	350	15	434948	435702	755	2827164	2827763	600
17	350	15	434948	435702	755	2842962	2843582	621
18	350	15	434948	435702	755	2867885	2868534	650
19	350	15	434948	435702	755	3789427	3789876	450
20	350	15	434948	435702	755	5297993	5298535	543
21	400	15	434898	435752	855	2614500	2616461	1962
22	400	15	434898	435752	855	2649950	2655132	5183
23	400	15	434898	435752	855	2659878	2660676	799
24	400	15	434898	435752	855	2820356	2820929	574
25	400	15	434898	435752	855	2827114	2827813	700
26	400	15	434898	435752	855	2842912	2843632	721
27	400	15	434898	435752	855	2867835	2868584	750
28	400	15	434898	435752	855	3789377	3789926	550
29	400	15	434898	435752	855	5297943	5298684	742

## Sheet: 2_markers_E.faecium
number	word length [bp]	number of clusters	start seq1	stop seq1	length seq1 [bp]	start seq2	stop seq2	length seq2 [bp]
1	100	9	634323	634557	235	1964522	1964675	154				correctly classified clusters
2	100	9	642412	642511	100	1964522	1964675	154
3	150	9	634323	634541	219	1964313	1964675	363
4	150	9	642280	642511	232	1964313	1964675	363
5	150	9	643879	644028	150	1964313	1964675	363
6	200	9	634323	634591	269	1964368	1964675	308
7	200	9	642230	642511	282	1964368	1964675	308
8	200	9	643829	644028	200	1964368	1964675	308
9	250	9	634323	634641	319	1964160	1964567	408
10	250	9	642180	642429	250	1964160	1964567	408
11	250	9	643779	644263	485	1964160	1964567	408
12	300	9	634323	634691	369	1964160	1964612	453
13	300	9	642130	642429	300	1964160	1964612	453
14	300	9	643729	644263	535	1964160	1964612	453
15	350	9	608214	608908	695	1964160	1964662	503
16	350	9	634323	634741	419	1964160	1964662	503
17	350	9	642080	642429	350	1964160	1964662	503
18	350	9	643679	644028	350	1964160	1964662	503
19	400	9	608186	608908	723	1964160	1964712	553
20	400	9	634323	634791	469	1964160	1964712	553
21	400	9	642030	642429	400	1964160	1964712	553
22	400	9	643629	644028	400	1964160	1964712	553
number	word length [bp]	start seq1	stop seq1	length seq1 [bp]	start seq2	stop seq2	length seq2 [bp]
2	100	642412	642511	100	1964522	1964675	154
5	150	643879	644028	150	1964313	1964675	363
8	200	643829	644028	200	1964368	1964675	308
15	350	608214	608908	695	1964160	1964662	503
17	350	642080	642429	350	1964160	1964662	503
18	350	643679	644028	350	1964160	1964662	503
19	400	608186	608908	723	1964160	1964712	553
21	400	642030	642429	400	1964160	1964712	553
22	400	643629	644028	400	1964160	1964712	553
100	9	23x100 char	[642412,642511]	23x154 char	[1964522,1964675]	'nucleoside-diphosphate kinase'	[642139,642576]	'nucleoside-diphosphate kinase'	[642139,642576]	'RNA methyltransferase'	[1964195,1964959]	'RNA methyltransferase'	[1964195,1964959]
150	9	23x150 char	[643879,644028]	23x363 char	[1964313,1964675]	'magnesium-translocating P-type ATPase'	[643235,645913]	'magnesium-translocating P-type ATPase'	[643235,645913]	'RNA methyltransferase'	[1964195,1964959]	'RNA methyltransferase'	[1964195,1964959]
200	9	23x200 char	[643829,644028]	23x308 char	[1964368,1964675]	'magnesium-translocating P-type ATPase'	[643235,645913]	'magnesium-translocating P-type ATPase'	[643235,645913]	'RNA methyltransferase'	[1964195,1964959]	'RNA methyltransferase'	[1964195,1964959]
350	9	23x695 char	[608214,608908]	23x503 char	[1964160,1964662]	'helix-turn-helix domain-containing protein'	[607594,608259]	'DUF1430 domain-containing protein'	[608385,610421]	[]	[]	'RNA methyltransferase'	[1964195,1964959]
350	9	23x350 char	[642080,642429]	23x503 char	[1964160,1964662]	'Rgg/GadR/MutR family transcriptional regulator'	[641251,642117]	'nucleoside-diphosphate kinase'	[642139,642576]	[]	[]	'RNA methyltransferase'	[1964195,1964959]
350	9	23x350 char	[643679,644028]	23x503 char	[1964160,1964662]	'magnesium-translocating P-type ATPase'	[643235,645913]	'magnesium-translocating P-type ATPase'	[643235,645913]	[]	[]	'RNA methyltransferase'	[1964195,1964959]
400	9	23x723 char	[608186,608908]	23x553 char	[1964160,1964712]	'helix-turn-helix domain-containing protein'	[607594,608259]	'DUF1430 domain-containing protein'	[608385,610421]	[]	[]	'RNA methyltransferase'	[1964195,1964959]
400	9	23x400 char	[642030,642429]	23x553 char	[1964160,1964712]	'Rgg/GadR/MutR family transcriptional regulator'	[641251,642117]	'nucleoside-diphosphate kinase'	[642139,642576]	[]	[]	'RNA methyltransferase'	[1964195,1964959]
400	9	23x400 char	[643629,644028]	23x553 char	[1964160,1964712]	'magnesium-translocating P-type ATPase'	[643235,645913]	'magnesium-translocating P-type ATPase'	[643235,645913]	[]	[]	'RNA methyltransferase'	[1964195,1964959]

## Sheet: Two_markers_E.faecium
number	word length [bp]	number of clusters	start seq1	stop seq1	length seq1 [bp]	start seq2	stop seq2	length seq2 [bp]
1	100	9	634311	634509	199	1964522	1964666	145				correctly classified clusters
2	100	9	642412	642528	117	1964522	1964666	145
3	150	9	634261	634559	299	1964472	1964716	245
4	150	9	642280	642578	299	1964472	1964716	245
5	150	9	643879	644070	192	1964472	1964716	245
6	200	9	634211	634609	399	1964368	1964766	399
7	200	9	642230	642628	399	1964368	1964766	399
8	200	9	643829	644120	292	1964368	1964766	399
9	250	9	634161	634659	499	1964318	1964816	499
10	250	9	642180	642678	499	1964318	1964816	499
11	250	9	643779	644277	499	1964318	1964816	499
12	300	9	634111	634709	599	1964268	1964866	599
13	300	9	642130	642728	599	1964268	1964866	599
14	300	9	643729	644327	599	1964268	1964866	599
15	350	9	608559	608912	354	1964218	1964916	699
16	350	9	634061	634759	699	1964218	1964916	699
17	350	9	642080	642778	699	1964218	1964916	699
18	350	9	643679	644377	699	1964218	1964916	699
19	400	9	608509	608962	454	1964168	1964966	799
20	400	9	634011	634809	799	1964168	1964966	799
21	400	9	642030	642828	799	1964168	1964966	799
22	400	9	643629	644427	799	1964168	1964966	799
